# Supplementary material for: Vortex flow induced self-assembly in CsPbI3 rods leads to an improved electrical response towards external analytes
Source: Royal Society of Chemistry journal article supplement (doi:10.1039/d4dt00013g), 2024-01-01
Supplement: d4dt00013g1.pdf [file d4dt00013g1.pdf]

## Supporting Information

### Vortex Flow Induced Self-Assembly in CsPbI<sub>3</sub> Rods Leads to Improved Electrical Response Towards External Analyte

Tufan Paul<sup>1</sup>, Avisek Maity<sup>2</sup>, Partha Bairi<sup>3</sup>, Aditi Sahoo<sup>1</sup>, Soumen Maiti<sup>4</sup>, Manoj Singh<sup>1</sup>, Barnali Ghosh<sup>2</sup> and Rupak Banerjee<sup>1,5\*</sup>

<sup>1</sup> Department of Physics, Indian Institute of Technology Gandhinagar, Palaj 382355, India.

<sup>2</sup> S. N. Bose National Centre for Basic Sciences, Salt Lake, Kolkata 700106, India.

<sup>3</sup> Centre of Excellence for Composites, Ahmedabad Textile Industry's Research Association (ATIRA), Ahmedabad 380015, India.

<sup>4</sup> St. Thomas College of Engineering & Technology Kolkata 700023, India.

<sup>5</sup> K C Patel Centre for Sustainable Development, Indian Institute of Technology Gandhinagar, Palaj 382355, India.

\*Corresponding author E-mail: rupakb@iitgn.ac.in

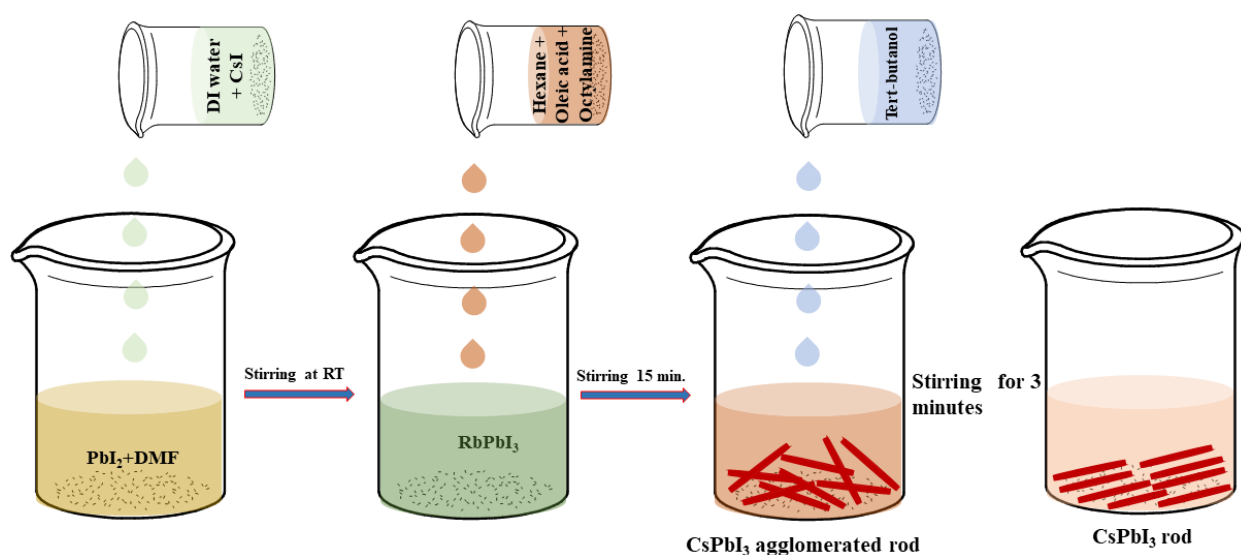

**Figure S1:** Schematic illustration of the CsPbI<sub>3</sub> synthesis procedure.

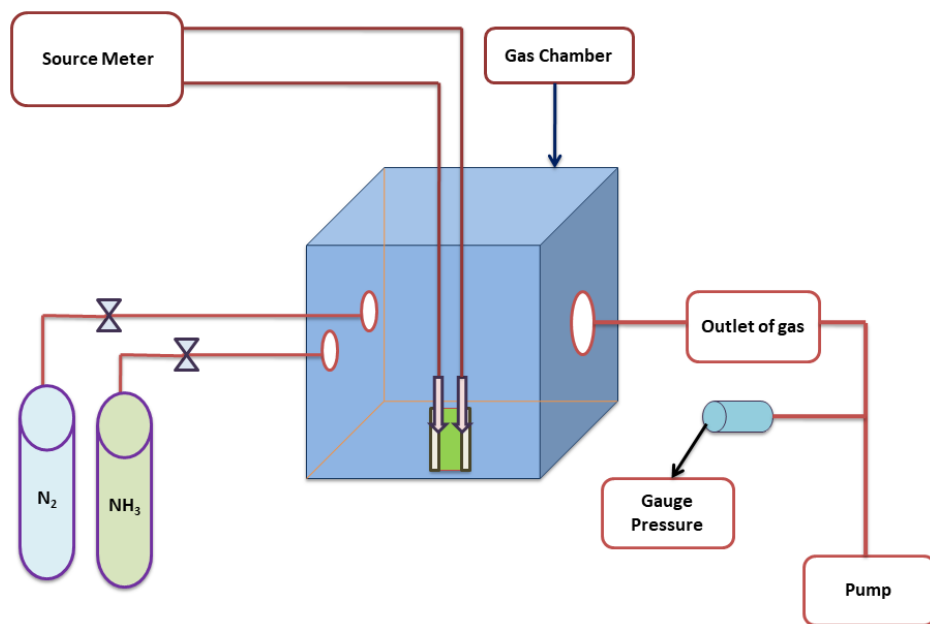

*Figure S2: Schematic diagram of our custom designed set up for sensing.*

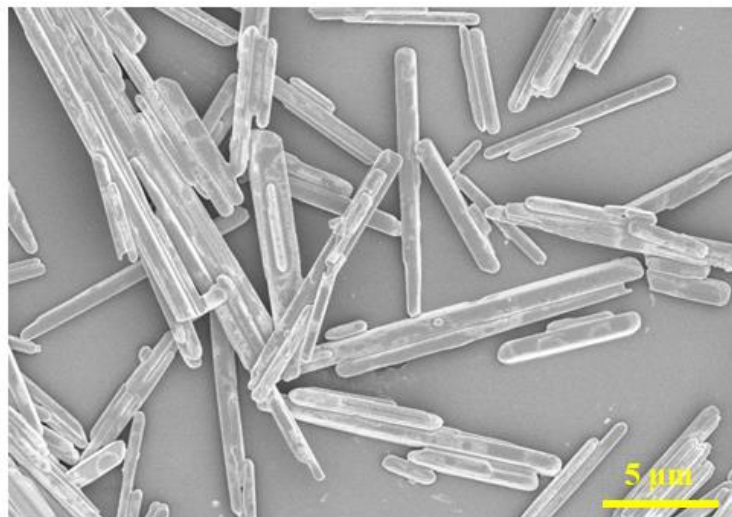

*Figure S3: FESEM image of CsPbI<sub>3</sub> microrods*

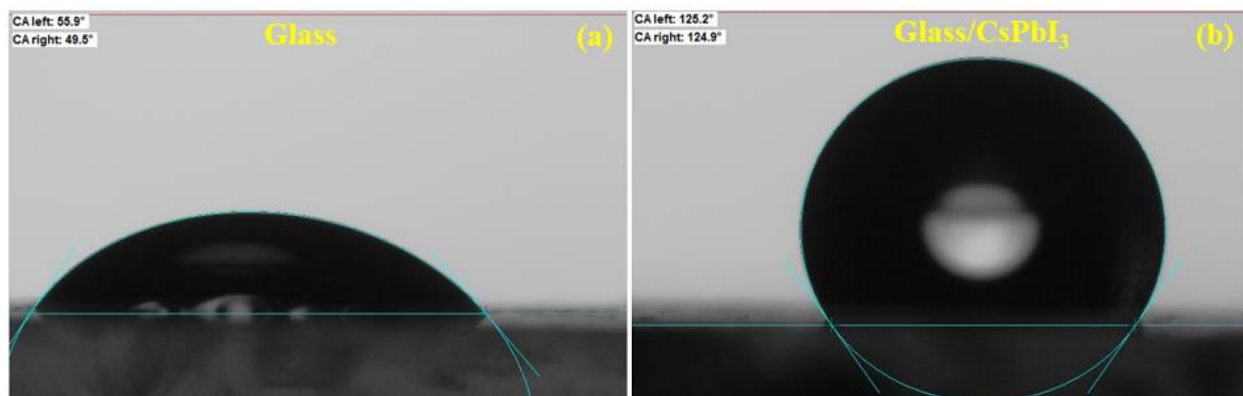

**Figure S4:** Contact angle measurement on (a) glass substrate and (b) self-assembled film on the glass substrate.

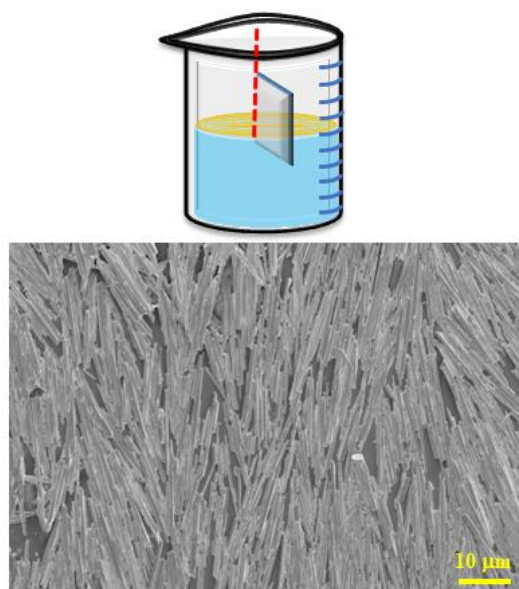

**Figure S5:** FESEM image of aligned CsPbI<sub>3</sub> rods on a glass substrate lifted from the beaker at an angle of 90°.

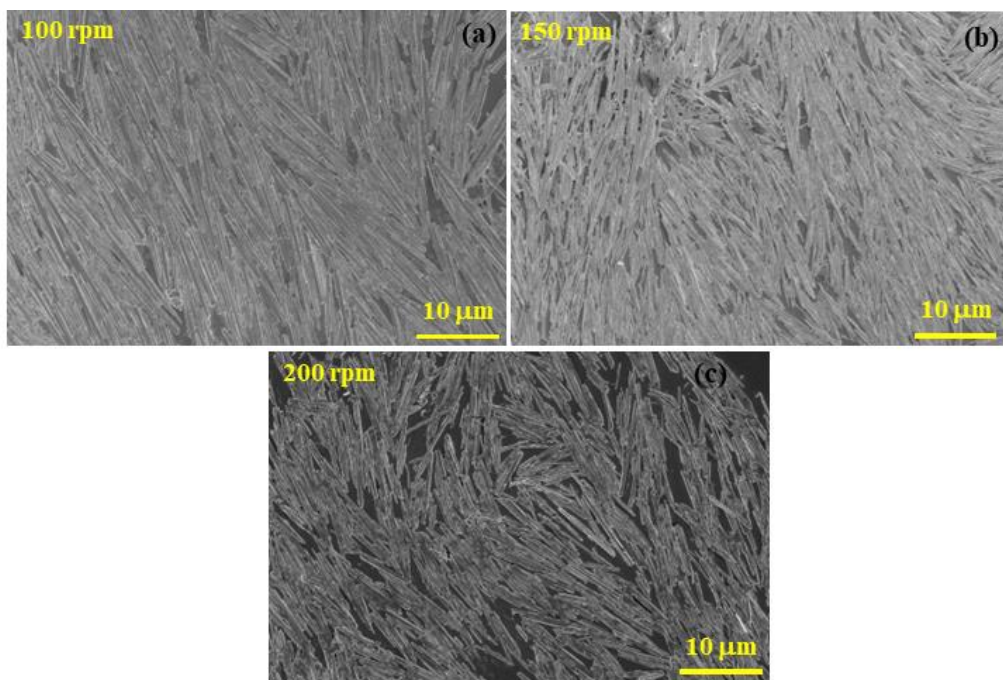

**Figure S6:** FESEM images of aligned CsPbI3 rods at (a) 100 rpm, (b) 150 rpm, and (c) 200 rpm rotational speed.

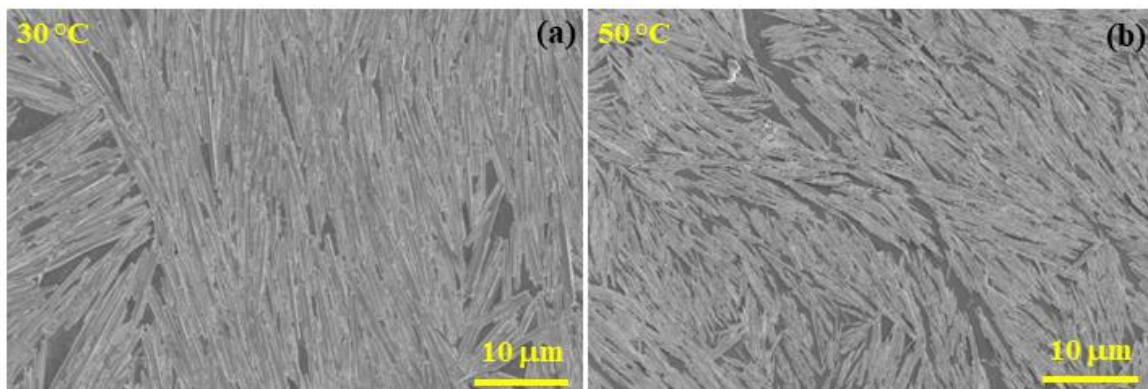

**Figure S7:** FESEM images showing differences in the alignment of CsPbI3 rods at (a) 30°C and (b) 50°C temperature of the subphase.

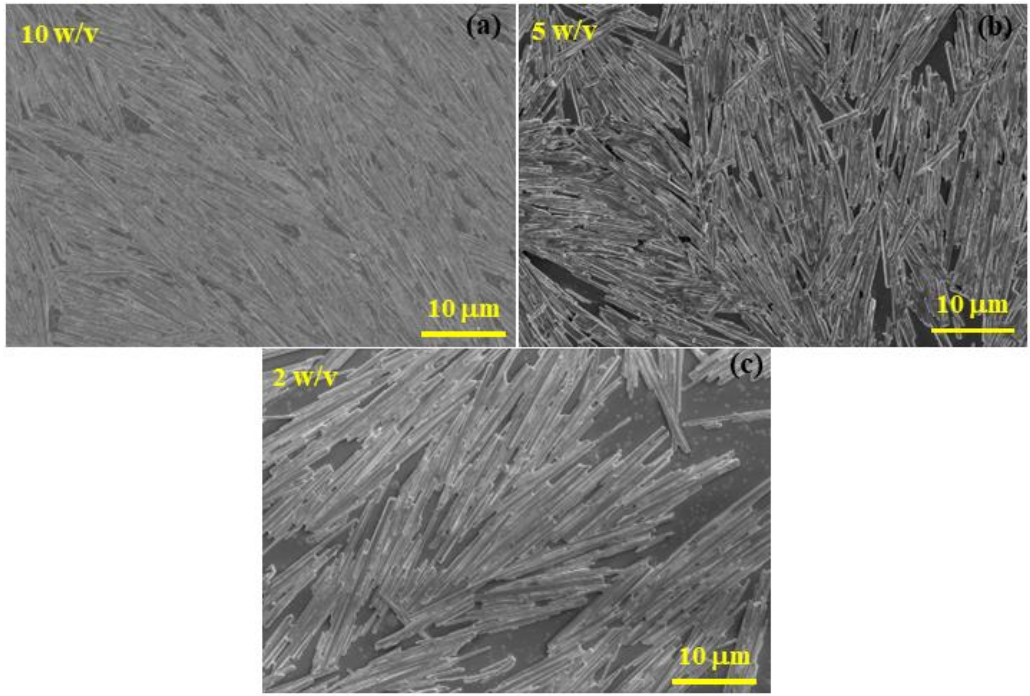

**Figure S8:** FESEM images of aligned  $\text{CsPbI}_3$  rods at (a) 10 w/v, (b) 5 w/v, and (c) 2 w/v concentration on a glass substrate.

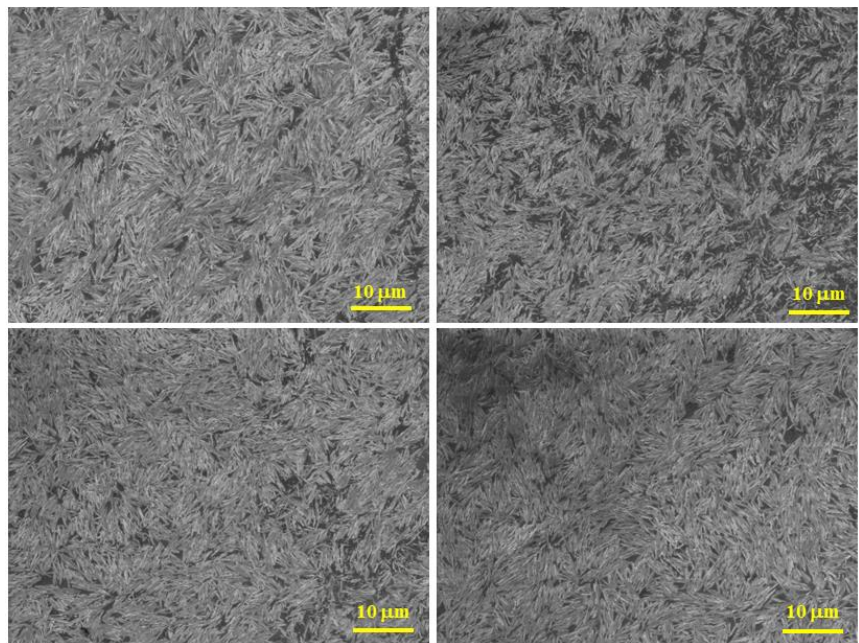

**Figure S9:** FESEM images of self-assembled  $\text{CsPbI}_3$  films on Si substrates.

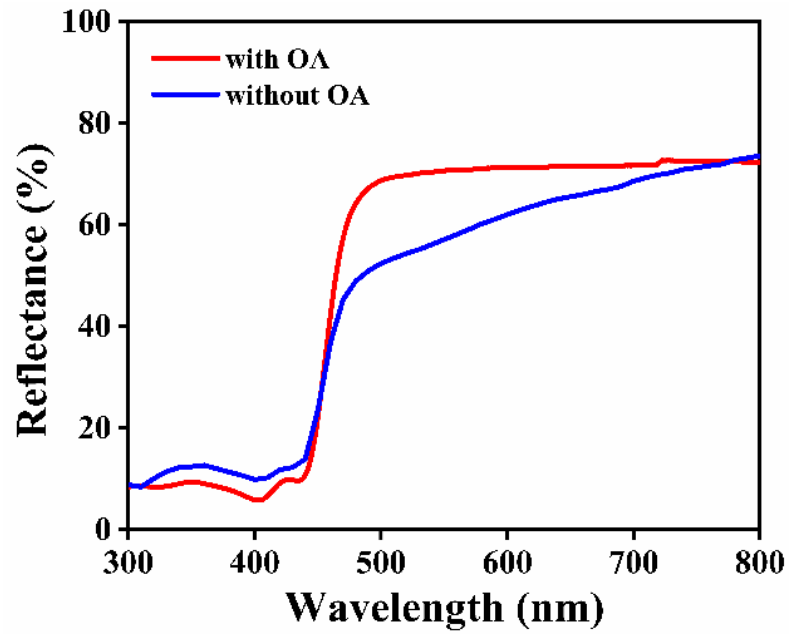

*Figure S10: UV-vis spectra of with OA and without OA of CsPbI<sub>3</sub>.*

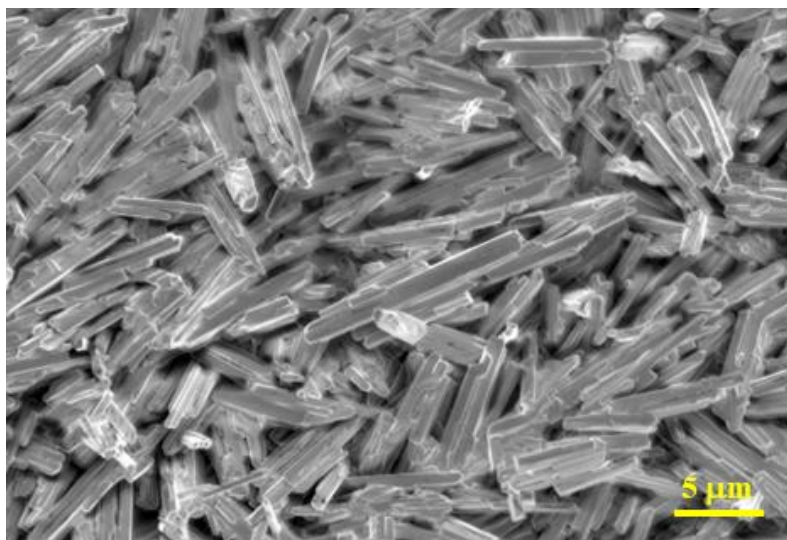

*Figure S11: FESEM image of CsPbI<sub>3</sub> without synthesis of OA.*

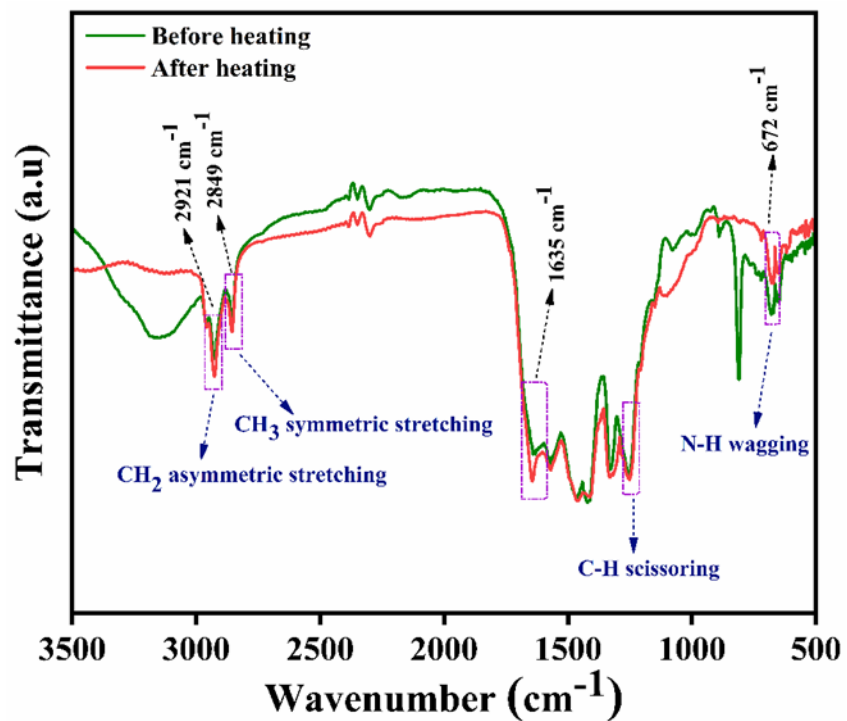

*Figure S12: FTIR spectra of the vortex-aligned CsPbI<sub>3</sub> samples before and after heating.*

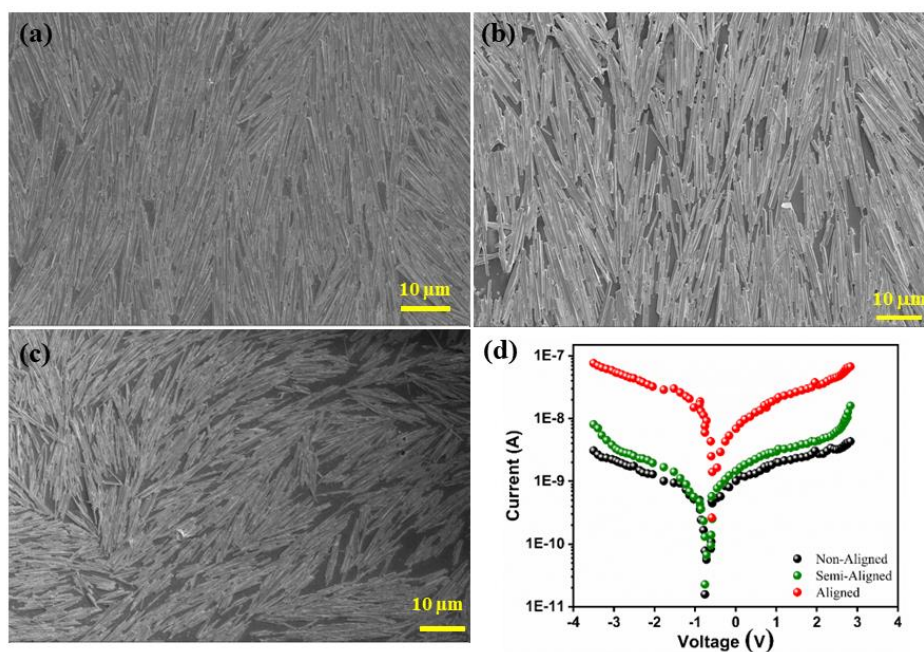

*Figure S13: FESEM image of (a) aligned, (b) semi-aligned, and (c) non-aligned thin films. (d) Shows the I-V characteristics for the CsPbI<sub>3</sub> films with different coverages.*
